# Supplementary material for: A process evaluation for a Water and Sanitation for Health Facility Improvement Tool (WASHFIT) intervention in Northern Uganda
Source: Research Square preprint supplement (doi:10.21203/rs.3.rs-6784690/v1), 2025-07-01
Supplement: Supplementary file 2 [file fdf9ce93e247fab41eaf1168.docx]

**Key Informant Interview Guide**

**Study title:** “To conduct a process evaluation for the Water and Sanitation for Health Facility Improvement Tool (WASHFIT) intervention among HCFs in Amuru and Nwoya districts, Northern Uganda.”

**Investigators:** Doreen Nakalembe

**FOR OFFICIAL USE ONLY**

| **Date of interview** |  |
| --- | --- |
| **Organization** |  |
| **District** |  |
| **Venue** |  |
| **Language of interview** |  |
| **Time interview started** |  |
| **Time interview ended** |  |
| **Key informant interview identifier** |  |

**Note: The key informant interview participant’s identifier should be created as follows:** Type the initials - “KI” – followed by the name of the district where the interview has taken place (first 3 digits), followed by the date of interview in the format **dd/mm/yy** and the participant’s id number (3 digits) For example, if the first respondent is interviewed on May 11th 2021 at a health facility A; this participant’s identifier should be in the form**: KI/ABC/11/05/2024/001.**

**Participant’s Socio-demographic characteristics**

| 1. | Name of facility |  |
| --- | --- | --- |
| 2. | Location of facility |  |
| 3. | Region/Province |  |
| 4. | District | Amuru  Nwoya |
| 5. | GPS Co-ordinates |  |
| 6. | Level of healthcare facility | Health center II |
| Health center III |
| District hospital |
| Regional referral Hospital |
| 7. | Ownership | Government/Public |
| Mission/faith-based |
| 8. | Age of the respondent |  |
| 9. | Sex | Female  Male |
| 10. | Highest level of Education | Certificate  Diploma  Bachelor  Masters  PhD |
| 11. | How long have you worked at this healthcare facility? |  |
| 12. | How long have you worked in the WASH/IPC sector? |  |

**Guiding questions**

1. What are your views on the MakSPH-GIZ WASH-IPC project? (**Probe:** In what ways did the WASHFIT intervention stand out from other similar programs in terms of its unique components and activities? **(*Implementation fidelity-program differentiation*)**
2. Who were the different actors/stakeholders involved in the implementation of the WASHFIT, and what were their roles and responsibilities during the implementation of the WASHFIT?) To what extent were the target healthcare facilities and health workers actively involved in the training and use of the WASHFIT? ***(Implementation fidelity-participant responsiveness)***
3. Can you describe the quality of the WASHFIT intervention's implementation in terms of documentation, communication, project planning, and project tracking? How well do you think the project achieved its intended outcomes? ***(Implementation Fidelity-Quality of the project)***
4. How were the project participants selected (criteria)? How about the focal persons at the healthcare facilities? Any challenges? ***(Reach)***
5. Comment on the key factors or conditions that have helped facilitate the successful implementation of the WASHFIT intervention at these healthcare facilities. ***(Facilitators)***
6. How familiar were you with the WASHFIT process before and after the training? Probes: (What did you learn about the WASHFIT? Was the training sufficient enough to understand and execute the WASHFIT intervention effectively? If yes, why and if No, why?) ***(Effectiveness)***
7. How effective was the training in enabling you to execute the following? ***(Effectiveness).***
8. Assembling and training the WASHFIT team
9. Holding regular meetings

b) Conducting an assessment at the facility

c) Undertaking hazard and risk assessment

d) Developing and implementing an improvement plan

e) A continuous evaluation and improving the plan

1. To what extent did you implement the following components of the WASHFIT following the training by the consultant (MakSPH)? Give reasons for your responses ***(Implementation Fidelity-Exposure)***
2. Assembling a WASHFIT team (**Probe:** How, why and what is the composition, Reasons for the existence or non-existence of the team, what were the challenges during assembling of the WASHFIT team)
3. Training the WASHFIT or similar team on WASH/IPC (**Probe:** How, why and what was the content of the training, participants, reasons for the training or non-training of the team, what were the challenges during the training)
4. Holding regular meetings on WASH/IPC (Probe: Were meetings held? How often? Participants? What facilitated the conduct of meetings? Documentation of the minutes? If not held, what were the barriers? Challenges faced during the sessions?
5. Conducting an assessment at the facility (Probe: Were facility assessments conducted? ***How was it done?*** How often? Participants? What facilitated the conduct of assessments? Assessment tools and findings? If not held, what were the barriers? Challenges faced during the assessments?
6. Undertaking hazard and risk assessment (Probe: Were hazard and risk assessments conducted? ***How was it done?*** How often? Participants? What facilitated the conduct of hazard and risk assessments? Assessment tools and findings? If not held, what were the barriers? Challenges faced during the hazard and risk assessments?
7. Development and implementation of an improvement plan (Probe: Was an improvement plan developed and implemented? ***How was it done?*** By whom? Participants during the development of an improvement plan? What facilitated the development and implementation of an improvement plan? If not held, what were the barriers? Challenges faced during the development and implementation of an improvement plan?
8. Continuous evaluation and improvement plan (Probe: Was a continuous evaluation and improvement plan developed and implemented? ***How was it done?*** By whom? Participants during the development of a continuous evaluation and improvement plan? What facilitated the development and implementation of a continuous evaluation and improvement plan? If not held, what were the barriers? Challenges faced during the development and implementation of a continuous evaluation of the improvement plan?
9. How have these healthcare workers adopted the following components of the WASHFIT process? ***(Implementation Fidelity-Participant Responsiveness)***
10. Assembling the WASHFIT team
11. Training the WASHFIT team
12. Holding regular meetings.
13. Facility assessments on WASH/IPC
14. Hazard and risk assessments
15. Development and implementation of improvement plans
16. Continuous evaluation of interventions
17. How have the healthcare facilities that participated in the implementation sustained the WASHFIT intervention practices over time, and what factors have influenced the maintenance and integration of these practices into routine operations? ***(Sustainability)***
18. What were the challenges faced during the implementation of WASHFIT? Probes (Were there any difficulties with resources, staff, or infrastructure? How did external factors (e.g., community engagement) affect the implementation? ***(Challenges)***
19. What key lessons did you learn during the implementation of WASHFIT? Probe: (What practices were most effective? Were there any unexpected insights gained from the implementation of the WASHFIT intervention? ***(Key lessons learned)***
20. What are your recommendations for future WASH/IPC or WASHFIT interventions? What are the reasons for that recommendation?
